# Supplementary material
Source: PubMed Central journal article supplement (PMC3996940)
Supplement: Supp_Figure2.pdf [file Supp_Figure2.pdf]

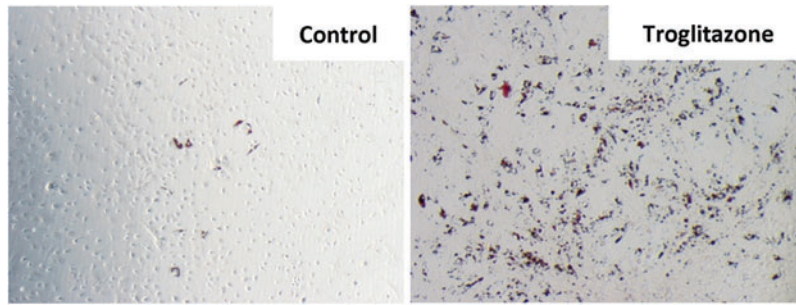

**SUPPLEMENTARY FIG. S2.** Effect of troglitazone on primary bone marrow (BM) stromal cell layers. BM mononuclear cells (MNCs) were grown as stromal layers in the presence of 10 mM troglitazone or control dimethyl sulfoxide (DMSO). Representative images of Oil Red O stain of stromal layers are shown.
