# Supplementary material
Source: PubMed Central journal article supplement (PMC3996940)
Supplement: Supp_Figure3.pdf [file Supp_Figure3.pdf]

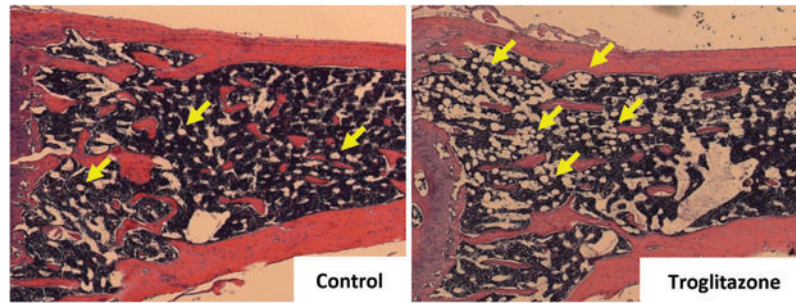

**SUPPLEMENTARY FIG. S3.** Troglitazone treatment increases the number of adipocytes in the BM. Mice were treated with troglitazone (5 mg/kg, three times per week) or DMSO control for 4 weeks. Representative hematoxylin and eosin staining of tibial sections from control- or troglitazone-treated mice following the treatment. *Yellow arrows* indicate representative adipocytes.
